# Supplementary material for: Development of attractants and repellents for Tuta absoluta based on plant volatiles from tomato and eggplant
Source: Frontiers journal article supplement (doi:10.3389/fsufs.2023.1155317), 2023-04-27
Supplement: Table_1.xlsx [file Table_1.xlsx]

## Sheet: Sheet1
Table S1. Volatile organic compounds detected in eggplant and tomato plants
Index	RT	Compounds	Exact mass(Da)	Formula	NIST_RI	Class	CAS	Eggplant-1	Eggplant-2	Eggplant-3	Tomato-1	Tomato-2	Tomato-3	VIP	p_value	Fold_Change	Log2FC	Type
XMW0435	3.69	2,4-Dimethylfuran	96.058	C6H8O	732	Heterocyclic compound	3710-43-8	485363	555662	444759	633120	745544	1.28646e+06	0.934977	0.187886	1.79375	0.842978	insig
WMW0123	3.7	Furan, 2-ethyl-	96.058	C6H8O	703	Heterocyclic compound	3208-16-0	1.06244e+06	1.19584e+06	968133	1.39655e+06	1.65652e+06	3.00824e+06	0.932787	0.197292	1.87865	0.909698	insig
WMW0045	4.6	Furan, 2,3-dihydro-4-methyl-	84.058	C5H8O	761	Heterocyclic compound	34314-83-5	140217	168682	188364	23324.8	39131.9	51473.8	1.21659	0.00327047	0.229115	-2.12585	down
KMW0057	4.9	2-Penten-1-ol, (Z)-	86.073	C5H10O	767	Alcohol	1576-95-0	849067	807106	1.05306e+06	728869	1.13121e+06	974069	0.0910567	0.782592	1.04611	0.0650342	insig
XMW0201	5.5	4-Hexen-3-one	98.073	C6H10O	855	Ketone	2497-21-4	626608	689541	1.00626e+06	83742.7	127384	163991	1.23246	0.0274279	0.161521	-2.63021	down
XMW0256	6.65	3-Methylpenta-1,3-diene-5-ol, (E)-	98.073	C6H10O	836	Alcohol	1572-08-3	271643	317856	404262	37243.6	53898.9	62201.9	1.24529	0.0160522	0.154307	-2.69612	down
KMW0088	6.87	trans-2-Hexen-1-al	98.073	C6H10O	854	Aldehyde	6728-26-3	1.09952e+07	1.30698e+07	1.72849e+07	942610	1.87544e+06	2.07016e+06	1.23412	0.0194764	0.118216	-3.08051	down
XMW0517	7.17	Thiophene, 3-ethyl-	112.035	C6H8S	894	Heterocyclic compound	1795-01-3	236918	252121	282744	337896	530010	435438	1.07394	0.0781242	1.68874	0.755951	insig
KMW0102	7.27	1-Hexanol	102.104	C6H14O	851	Alcohol	111-27-3	352645	342140	467831	296946	528256	304318	0.1886	0.905852	0.971533	-0.0416652	insig
KMW0081	8.41	Furfural	96.021	C5H4O2	829	Aldehyde	98-01-1	964651	1.55105e+06	1.35003e+06	72963.1	118384	159836	1.24153	0.0191307	0.0908453	-3.46044	down
D371	8.69	3-Hexen-1-ol, formate, (Z)-	128.084	C7H12O2	920	Ester	33467-73-1	46230.1	45619	59245	66037.5	86879.3	84026.2	1.07633	0.0275666	1.56818	0.649092	insig
KMW0144	8.81	Hexanoic acid, methyl ester	130.099	C7H14O2	1000	Ester	106-70-7	23413.8	29849.9	39231.4	17866.4	52982.1	24658.7	0.137122	0.937527	1.03256	0.0462306	insig
XMW0632	9.16	Bicyclo[3.1.1]hept-2-ene, 3,6,6-trimethyl-	136.125	C10H16	948	Terpenes	4889-83-2	7514.77	6737.89	7079.9	30740.4	42815	36540.8	1.24272	0.0133211	5.16095	2.36764	up
KMW0133	9.45	1-Hexanol, 4-methyl-	116.12	C7H16O	911	Alcohol	818-49-5	24147.6	29526.3	48660.6	22143.2	37338.6	27013.2	0.392715	0.58267	0.845218	-0.242605	insig
KMW0187	9.7	2-Octanone	128.12	C8H16O	999	Ketone	111-13-7	41067.6	44856.8	48079.5	27351.1	49848.1	41102.7	0.537046	0.513572	0.882824	-0.179801	insig
KMW0158	9.93	Benzaldehyde	106.042	C7H6O	960	Aldehyde	100-52-7	1.30818e+06	2.10756e+06	1.56329e+06	172192	236795	286244	1.24214	0.0243424	0.139632	-2.8403	down
XMW0890	10.04	1-Hepten-6-one, 2-methyl-	126.104	C8H14O	966	Ketone	10408-15-8	8935.27	9840.36	7259.59	4703.64	10063.4	8823.96	0.380779	0.681243	0.90612	-0.142227	insig
NMW0791	10.19	Benzene, 1-ethyl-2-methyl-	120.094	C9H12	970	Aromatics	611-14-3	79895.2	75251.3	80099.8	87404	104682	86755.3	0.988035	0.123396	1.18532	0.245274	insig
KMW0173	10.51	1-Octen-3-ol	128.12	C8H16O	982	Alcohol	3391-86-4	286945	275610	357171	290936	538708	347691	0.571299	0.372901	1.28009	0.35625	insig
XMW1138	10.62	6-Octen-1-ol, 7-methyl-3-methylene-	154.136	C10H18O	1195	Terpenes	13066-51-8	26608.8	23562.3	24208.1	32887.2	56111.8	43802.1	1.07545	0.098327	1.78546	0.836297	insig
XMW0226	10.73	2-Heptanone, 4,6-dimethyl-	142.136	C9H18O	924	Ketone	19549-80-5	42471.1	40618.9	49380.3	36996.1	58946.6	43955.5	0.12564	0.749835	1.05607	0.0787086	insig
KMW0128	10.75	Hexanoic acid	116.084	C6H12O2	1019	Acid	142-62-1	524650	469821	641211	715863	1.65691e+06	810047	0.9072	0.224577	1.94587	0.960412	insig
KMW0182	10.83	2-Pentylfuran	138.104	C9H14O	993	Heterocyclic compound	3777-69-3	434663	516454	641351	48215.1	50133.7	52985.3	1.25509	0.0152536	0.0950311	-3.39546	down
XMW0928	11.13	Benzenemethanol, .alpha.,4-dimethyl-	136.089	C9H12O	1118	Alcohol	536-50-5	185680	168255	213637	317177	525415	377729	1.13647	0.0662917	2.15007	1.10438	insig
KMW0201	11.43	trans, trans-2,4-Heptandienal	110.073	C7H10O	1011	Aldehyde	4313-03-5	1.92584e+06	2.45747e+06	3.39298e+06	80579	93033.3	191215	1.24431	0.0281531	0.0469154	-4.4138	down
WMW0174	11.56	Benzene, 1,2-dichloro-	145.969	C6H4Cl2	1043	Aromatics	95-50-1	6105.12	6829.15	7943.36	6750.63	10335.3	8042.11	0.606326	0.315553	1.20359	0.267339	insig
KMW0259	11.6	.gamma.-Terpinene	136.125	C10H16	1074	Terpenes	99-85-4	40070.8	32065.4	36649.6	8134.42	10703.2	13004.9	1.23126	0.00168664	0.292709	-1.77246	down
XMW0011	11.74	1,4-Diethylbenzene	134.11	C10H14	1041	Aromatics	105-05-5	20955.3	15878	11834.7	44165.4	62233	46913.5	1.19789	0.0128887	3.15016	1.65542	up
XMW0126	11.9	Benzene, 1-methyl-3-(1-methylethyl)-	134.11	C10H14	1042	Aromatics	535-77-3	19189.1	15289.5	21376.5	259773	561015	314597	1.23388	0.0602883	20.3273	4.34535	insig
XMW0601	12	2-Ethyl-1-hexanol	130.136	C8H18O	995	Alcohol	100-51-6	939084	677921	847417	6.83981e+06	1.23857e+07	7.94667e+06	1.23584	0.0395779	11.0258	3.46281	up
WMW0047	12.05	5-Ethylcyclopent-1-enecarboxaldehyde	124.089	C8H12O	1040	Aldehyde	36431-60-4	43340.4	40275	51265.9	315365	550903	381449	1.23366	0.0337014	9.25049	3.20953	up
XMW0486	12.21	Cyclohexanone, 2,2,6-trimethyl-	140.12	C9H16O	1086	Ketone	2408-37-9	103158	80939.3	93127.4	37865.2	49917.4	50604.8	1.20052	0.00615491	0.499188	-1.00235	down
KMW0323	12.24	Benzyl alcohol	108.058	C7H8O	1039	Alcohol	100-51-6	2.48483e+06	3.45625e+06	3.65592e+06	1.02062e+06	1.41563e+06	1.11395e+06	1.21292	0.0219654	0.369927	-1.43469	down
KMW0212	12.43	Phenylacetaldehyde	120.058	C8H8O	1049	Aldehyde	122-78-1	174668	110027	201233	106343	156135	164533	0.345937	0.583833	0.878751	-0.186473	insig
KMW0183	12.44	2-Ethyl-5-methylpyrazine	122.084	C7H10N2	993	Heterocyclic compound	13360-64-0	22493.7	24072.6	28866	9338.12	12082.7	12282.2	1.22658	0.00795393	0.446798	-1.1623	down
XMW1384	12.56	2-Furancarboxylic acid, cyclobutyl ester	166.063	C9H10O3	1230	Ester	1000282-75-9	14056.8	12945	12489	6370.96	8804.49	8616.66	1.17081	0.00828213	0.602472	-0.731034	insig
WMW0121	12.62	Nonane, 3,7-dimethyl-	156.188	C11H24	1038	Alkanes	17302-32-8	3072.8	3430.4	3651.87	4791.07	4434.06	4280.48	1.15644	0.00811765	1.32994	0.41136	insig
XMW0202	12.69	cis-2,6-Dimethyl-2,6-octadiene	138.141	C10H18	985	Olefin	2492-22-0	40896	26473.2	18907.5	30340.7	51707.5	47266.4	0.769724	0.192518	1.49884	0.583844	insig
KMW0253	12.88	2-octenal	126.104	C8H14O	1060	Aldehyde	2363-89-5	405453	465794	442030	128473	203806	211042	1.20228	0.00224109	0.413714	-1.2733	down
XMW0008	12.93	Isophorone	138.104	C9H14O	1124	Ketone	78-59-1	405726	463402	440959	128481	204202	211519	1.20155	0.00247968	0.415394	-1.26745	down
NMW0047	12.97	2-Ethylphenol	122.073	C8H10O	1139	Phenol	90-00-6	78760.9	39005.7	79201.7	9852.57	12541.6	8565.92	1.20383	0.052376	0.157183	-2.66948	insig
XMW0600	13	Octane, 3,3-dimethyl-	142.172	C10H22	932	Alkanes	4110-44-5	20713.1	22755.1	18641.7	21262.6	16960.6	13539.5	0.659678	0.264845	0.833404	-0.262911	insig
KMW0280	13.2	3,5-Octadien-2-one	124.089	C8H12O	1095	Ketone	38284-27-4	1.12639e+06	1.37457e+06	973145	939980	1.15126e+06	1.43444e+06	0.000582132	0.930573	1.01485	0.0212596	insig
XMW1127	13.29	Formic acid, octyl ester	158.131	C9H18O2	1114	Ester	112-32-3	159396	144399	204648	288777	558316	369438	1.09732	0.0913455	2.39266	1.25861	insig
KMW0258	13.69	2-Methoxyestradiol	124.052	C7H8O2	1089	Aromatics	90-05-1	33797.3	41948.4	74704.5	201322	267869	117983	1.12364	0.0686128	3.90278	1.9645	insig
KMW0286	13.8	2-Isopropyl-3-methoxypyrazine	152.095	C8H12N2O	1097	Heterocyclic compound	25773-40-4	NS	NS	NS	92039.3	156628	105742	1.24539	0.0287388	24.7445	4.62904	up
XMW0775	13.97	1-Undecene, 9-methyl-	168.188	C12H24	1152	Olefin	74630-41-4	172050	111306	224457	211983	351139	221084	0.805489	0.17944	1.54428	0.626935	insig
KMW0288	14.08	Ethyl heptanoate	158.131	C9H18O2	1100	Ester	106-30-9	21260.9	65323.2	47289.3	1.01092e+06	682580	920942	1.21797	0.0126317	19.5292	4.28756	up
XMW0403	14.2	Nonane, 2,5-dimethyl-	156.188	C11H24	1021	Alkanes	17302-27-1	53292.5	35552	61381.5	79578.4	104379	66521.5	0.981332	0.0762326	1.66734	0.737553	insig
XMW0289	14.23	2-Acetyl-5-methylfuran	124.052	C7H8O2	967	Heterocyclic compound	1193-79-9	21715	20210.7	31259.4	31188.3	33409.7	34981.7	0.927435	0.115225	1.36066	0.444302	insig
XMW0527	14.3	2-Cyclohexen-1-ol, 1-methyl-4-(1-methylethyl)-, cis-	154.136	C10H18O	1109	Alcohol	29803-82-5	117018	107558	131548	42643.3	65727.6	61315.7	1.19168	0.00333495	0.476482	-1.06951	down
NMW0139	14.3	3-Methyl-4-isopropylphenol	150.104	C10H14O	1334	Phenol	3228-02-2	64351.8	67454	105580	40562.3	52971.8	57714.8	0.987953	0.151173	0.637145	-0.650306	insig
XMW0411	14.48	Cyclohexanol, 2,6-dimethyl-	128.12	C8H16O	1112	Alcohol	5337-72-4	636679	704760	430284	303188	474049	534867	0.722951	0.230279	0.740581	-0.43327	insig
KMW0284	14.57	2-Phenylethano	122.073	C8H10O	1118	Alcohol	60-12-8	199799	210349	257507	739863	1.05297e+06	782795	1.22419	0.0201625	3.85772	1.94775	up
XMW0366	14.66	Benzene, 1,2,3,5-tetramethyl-	134.11	C10H14	1133	Aromatics	527-53-7	5292.79	4657.77	7422.16	5230.74	7350.18	5861.56	0.212951	0.751529	1.06158	0.086209	insig
XMW0048	15.06	o-Nitrophenol	139.027	C6H5NO3	1297	Phenol	88-75-5	13468.4	10783	15878.3	106655	125742	112031	1.24541	0.00187069	8.58289	3.10146	up
KMW0344	15.14	1-Nonanol	144.151	C9H20O	1154	Alcohol	143-08-8	167975	114319	210467	356520	538821	382043	1.13591	0.0275549	2.5923	1.37423	up
XMW0685	15.19	(2S,6R,7S,8E)-(+)-2,7-Epoxy-4,8-megastigmadiene	192.151	C13H20O	1325	Olefin	108342-25-2	30973.7	24419.4	33197.9	18865.6	23247.8	22047.6	1.04382	0.0715752	0.724239	-0.465463	insig
XMW0581	15.41	Benzene, 1,2-dimethoxy-	138.068	C8H10O2	1059	Aromatics	91-16-7	28407.1	27769.3	32884.2	25261.1	32741.9	22472.1	0.520562	0.468691	0.903599	-0.146245	insig
XMW0537	15.48	1H-Inden-5-ol, 2,3-dihydro-	134.073	C9H10O	1267	Phenol	1470-94-6	35697.6	59611.7	41154.9	8245.77	9354.62	8485.74	1.23747	0.0363138	0.191157	-2.38717	down
XMW1459	15.6	Thiophene, 2-butyl-5-ethyl-	168.097	C10H16S	1223	Heterocyclic compound	54411-06-2	82534	78118.2	100867	43086	63497.1	62380	1.08033	0.0327181	0.646084	-0.630207	insig
KMW0345	15.72	Trans,cis-2,6-Nonadienal	138.104	C9H14O	1154	Aldehyde	557-48-2	954189	981296	1.8172e+06	8418.48	9571.99	16104.9	1.254	0.0484492	0.00908558	-6.78221	down
XMW1473	15.89	2-Cyclohexen-1-one, 4-hydroxy-3-methyl-6-(1-methylethyl)-, trans-	168.115	C10H16O2	1432	Ketone	55955-53-8	168321	188315	178861	83138.4	115800	127925	1.14191	0.0217321	0.610394	-0.712188	insig
KMW0338	15.94	trans-2-Nonenal	140.12	C9H16O	1162	Aldehyde	18829-56-6	225659	257856	395939	19588.9	27084.8	32043.2	1.24745	0.0356708	0.0895067	-3.48186	down
XMW0170	16.04	3-Ethylbenzaldehyde	134.073	C9H10O	1168	Aldehyde	34246-54-3	182650	239015	171988	72026.3	62687.4	159017	1.01234	0.0622199	0.494785	-1.01513	insig
KMW0464	16.28	Octanoic acid	144.115	C8H16O2	1279	Acid	124-07-2	109339	77877.6	109711	60161.2	101191	63035.7	0.751917	0.229452	0.755699	-0.404117	insig
WMW0061	16.4	2-Ethylbenzaldehyde	134.073	C9H10O	1176	Aldehyde	22927-13-5	85932.4	58711.3	79780	34892.7	34996	49341.2	1.12612	0.0309794	0.531271	-0.91248	insig
KMW0274	16.44	Maltol	126.032	C6H6O3	1087	Heterocyclic compound	118-71-8	20142.4	22165.9	23339.5	11835.1	10324	13708	1.21331	0.00185135	0.546358	-0.872082	insig
XMW0124	16.57	3-Ethynylaniline	117.058	C8H7N	1203	Amine	54060-30-9	1111.74	1317.2	1434.58	1541.32	1895.37	1414.94	0.864939	0.139182	1.25575	0.328553	insig
XMW0443	16.69	(E)-2,6-Dimethylocta-3,7-diene-2,6-diol	170.131	C10H18O2	1197	Alcohol	51276-34-7	6143.48	5891.78	7196.79	70172.3	31388.6	108767	1.18959	0.10407	10.9363	3.45106	insig
KMW0404	16.72	Naphthalene	128.063	C10H8	1214	Aromatics	91-20-3	84818.8	88849.9	86756.7	66398.2	63844.2	70356.6	1.23003	0.00193432	0.770274	-0.376556	insig
XMW0532	16.76	1H-Pyrazole-1-carboximidamide, 3,5-dimethyl-	138.091	C6H10N4	1096	Heterocyclic compound	22906-75-8	2726.48	2310.44	3265.03	148229	229757	176421	1.24929	0.0168016	66.7803	6.06135	up
KMW0421	16.92	2-Hydroxy-benzoicacimethylester	152.047	C8H8O3	1234	Ester	119-36-8	3.91272e+06	6.65181e+06	6.32821e+06	3.07986e+06	3.20229e+06	2.85897e+06	1.09951	0.0940868	0.541128	-0.885959	insig
KMW0390	17.01	Ethyl octanoate	172.146	C10H20O2	1198	Ester	106-32-1	58715.9	122142	51588.3	1.43738e+06	674356	1.22057e+06	1.21811	0.0438265	14.3359	3.84156	up
KMW0479	17.13	2,6,6-Trimethyl-1,3-Cyclohexadiene-1-Carboxaldehyde	150.104	C10H14O	1300	Terpenes	116-26-7	15973.9	12830.4	12092.6	9262.75	10208.3	12413.5	0.909971	0.121951	0.779634	-0.359131	insig
KMW0406	17.17	Dodecane	170.203	C12H26	1200	Alkanes	112-40-3	60609.6	71011.5	74960.6	72478.6	49791	58335.9	0.602874	0.34299	0.874257	-0.19387	insig
KMW0399	17.3	Decanal	156.151	C10H20O	1209	Aldehyde	112-31-2	9864.78	8518.02	11862.1	5451.86	5159.75	8561.09	1.01469	0.0654585	0.633915	-0.657639	insig
WMW0145	17.54	Undecane, 4,6-dimethyl-	184.219	C13H28	1196	Alkanes	17312-82-2	13542.2	15917.1	16592.8	22978.2	26713.3	27039.3	1.17567	0.00432206	1.66617	0.736536	insig
KMW0407	17.56	trans,trans-2,4-Nonadienal	138.104	C9H14O	1217	Aldehyde	5910-87-2	208269	427486	295405	4290.83	3981.59	9512.72	1.24614	0.0410282	0.0191	-5.71028	down
XMW0255	17.58	2,4-dimethylbenzaldehyde	134.073	C9H10O	1208	Aldehyde	15764-16-6	23377.3	27951	25349.8	4605.5	3519.24	6446.79	1.23413	0.000479319	0.190035	-2.39566	down
KMW0434	17.71	beta-Cyclocitral	152.12	C10H16O	1250	Terpenes	432-25-7	1.48529e+06	1.48442e+06	1.44271e+06	758082	1.04566e+06	1.1835e+06	1.08353	0.0613678	0.677007	-0.562758	insig
XMW0109	17.79	Dodecane, 4-methyl-	184.219	C13H28	1249	Alkanes	6117-97-1	18940.5	22266.9	23582.1	17718.4	13401.3	15399.9	1.06365	0.0311896	0.718011	-0.477922	insig
KMW0425	17.87	Benzothiazole	135.014	C7H5NS	1240	Heterocyclic compound	95-16-9	22455.7	24224.6	25208.6	30503.9	28119.8	27605.5	1.12637	0.0168053	1.19948	0.262407	insig
KMW0443	18.21	3-methylnonane-2,4-dione	170.131	C10H18O2	1253	Ketone	113486-29-6	114929	109998	159553	94705.8	96094.2	104916	0.928619	0.197459	0.769133	-0.378696	insig
XMW0371	18.33	Nonane, 5-methyl-5-propyl-	184.219	C13H28	1229	Alkanes	17312-75-3	19436.9	29281.4	23866.7	17977.8	10974.9	14812.1	1.01109	0.0575229	0.602945	-0.729901	insig
NMW0104	18.57	2,6-Octadien-1-ol, 3,7-dimethyl-	154.136	C10H18O	1260	Alcohol	624-15-7	14744.2	17750.8	17950.1	27822.5	29405	25923.1	1.19893	0.00166	1.64834	0.721016	insig
XMW0110	18.68	Dodecane, 4,6-dimethyl-	198.235	C14H30	1285	Alkanes	61141-72-8	30987.6	37914.3	39081.8	50676.1	53980.9	56266.8	1.14663	0.00679772	1.49026	0.575564	insig
KMW0365	18.75	2-((3,3-Dimethyloxiran-2-yl)methyl)-3-methylfuran	166.099	C10H14O2	1178	Heterocyclic compound	92356-06-4	71768.3	61723.9	65983.8	22953.2	25920.1	28911.4	1.24421	0.000848025	0.389945	-1.35866	down
XMW0108	18.93	2,4-Dimethyldodecane	198.235	C14H30	1285	Alkanes	6117-99-3	40747.2	52810.7	57126.2	51891.2	38584.4	42091.9	0.531138	0.395196	0.879771	-0.1848	insig
KMW0557	19.08	Benzoic acid, 2-hydroxy-, ethyl ester	166.063	C9H10O3	1436	Ester	118-61-6	5185.23	5601.04	6935.91	9597.72	9881.73	10945.9	1.16594	0.00388202	1.71679	0.779717	insig
XMW0692	19.12	2,2,4,4,6,8,8-Heptamethylnonane	226.266	C16H34	1294	Alkanes	4390-04-9	6097.08	11076.1	10849	9511.87	7230.5	7175.93	0.375651	0.504291	0.85355	-0.228452	insig
XMW0099	19.59	Decane, 2,3,5-trimethyl-	184.219	C13H28	1121	Alkanes	62238-11-3	7954.47	10489.5	9556.64	6523.05	4336.11	5987.74	1.08824	0.0203808	0.601661	-0.732977	insig
XMW0253	19.76	Undecane, 5-methyl-	170.203	C12H26	1150	Alkanes	1632-70-8	11615.2	11837.8	13285.9	10799.3	6229.23	9092.38	0.911393	0.102946	0.710988	-0.492102	insig
XMW0163	19.79	Furan, 2-hexyl-	152.12	C10H16O	1139	Heterocyclic compound	3777-70-6	71745.4	225699	180230	39650.7	136716	130075	1.25578	0.0733262	6.28042e-06	-17.2807	insig
XMW0662	19.87	Naphthalene, 2-methyl-	142.078	C11H10	1298	Aromatics	91-57-6	13692.4	13917.3	13321.1	9995.11	10127.7	9972.33	1.24923	0.00122271	0.735267	-0.443659	insig
XMW0611	20.16	Decane, 2,3,6-trimethyl-	184.219	C13H28	1121	Alkanes	62238-12-4	10801.9	12946.2	14245.1	14227.6	9207.35	13815.7	0.132497	0.903609	0.980455	-0.0284772	insig
XMW0047	20.39	Phenol, 2-(1-methylpropyl)-	150.104	C10H14O	1248	Phenol	89-72-5	190100	297584	207393	3726.34	3428.64	9309.55	1.244	0.0207292	0.0236873	-5.39974	down
XMW0179	20.56	Dodecane, 2,6,11-trimethyl-	212.25	C15H32	1275	Alkanes	31295-56-4	37377.2	55967.9	54271.5	51122.2	32622.5	46575	0.409553	0.517802	0.882825	-0.1798	insig
XMW0602	20.82	Undecane, 5,7-dimethyl-	184.219	C13H28	1190	Alkanes	17312-83-3	11871.6	17362.3	17359.7	16804.2	10086.7	13933.5	0.420625	0.511522	0.876179	-0.190703	insig
KMW0315	20.94	2-Acetyl-3,4,5,6-tetrahydropyridine	125.084	C7H11NO	1127	Heterocyclic compound	27300-27-2	35249.7	46802.5	28192.3	2823.42	2209.02	3407.88	1.2421	0.0242232	0.07656	-3.70726	down
XMW0374	21.11	2-Propylphenol, n-propyl ether	178.136	C12H18O	1380	Ether	1000395-18-6	278059	201418	335545	527949	512059	564967	1.14568	0.011838	1.96924	0.977641	insig
XMW0552	21.26	2,2'-Isopropylidenebis(5-methylfuran)	204.115	C13H16O2	1458	Heterocyclic compound	59212-75-8	4069.31	2103.86	3103.48	10847.7	9275.85	10526.8	1.20424	0.000754061	3.30402	1.72422	up
XMW1093	21.46	1, 1, 5-Trimethyl-1, 2-dihydronaphthalene	172.125	C13H16	1396	Terpenes	1000357-25-8	3847.27	5141.59	3672.92	2695.26	2444.28	3804.78	0.926995	0.118731	0.706403	-0.501438	insig
NMW0205	21.65	Precocene I	190.099	C12H14O2	1466	Heterocyclic compound	17598-02-6	38345.4	44337.3	32288.8	21078.1	21689.2	32547.2	1.01496	0.0607327	0.655071	-0.610277	insig
XMW0420	21.7	Undecane, 2,9-dimethyl-	184.219	C13H28	1233	Alkanes	17301-26-7	6441.33	10272.2	9025.53	9733.58	7111.16	8403.42	0.0415759	0.910735	0.98093	-0.0277785	insig
XMW0617	21.89	Propanoic acid, 2-methyl-, 3-hydroxy-2,2,4-trimethylpentyl ester	216.173	C12H24O3	1380	Ester	77-68-9	16992.3	20515	22376	21548.4	14800.4	17472.5	0.471505	0.469202	0.89877	-0.153976	insig
XMW0376	22.02	10-Methyltricyclo[4.3.1.1(2,5)]undecan-10-ol	180.151	C12H20O	1194	Alcohol	1000187-06-1	152394	212748	227741	119957	101411	139882	1.08522	0.0597257	0.60931	-0.714751	insig
NMW0244	22.39	Phenol, 4-hexyl-	178.136	C12H18O	1567	Phenol	2446-69-7	19228.9	15981.4	21279.5	35329.3	29566.1	38071.5	1.17239	0.0102637	1.82276	0.866121	insig
KMW0551	22.65	Tetradecane	198.235	C14H30	1400	Alkanes	629-59-4	53630.3	75778.9	55307	76312.9	34168	54543.3	0.330323	0.671161	0.893393	-0.162632	insig
NMW0301	22.81	Acetaminophen	151.063	C8H9NO2	1697	Phenol	103-90-2	242562	155105	585093	63124.3	90063.9	22293.7	1.03865	0.174194	0.17856	-2.48552	insig
NMW0184	22.84	Ionone	192.151	C13H20O	1426	Terpenes	8013-90-9	35051.1	42521.5	29346.6	11320.4	11064.2	17689.4	1.18625	0.0128929	0.374807	-1.41578	down
XMW1343	23.01	1-(3-Ethoxyphenyl)acetone	178.099	C11H14O2	1417	Ketone	23037-47-0	26675.6	25071.6	40099.9	11476.8	10065.3	13194.3	1.19779	0.0528141	0.378198	-1.40279	insig
KMW0554	23.2	.alpha.-Ionone	192.151	C13H20O	1422	Terpenes	127-41-3	315064	472838	309869	185658	198376	211331	1.14041	0.0859317	0.54234	-0.88273	insig
XMW0699	23.24	.beta.-Panasinsene	204.188	C15H24	1411	Terpenes	1000159-39-0	8945.25	11941.6	7460.96	366397	436020	356978	1.25232	0.0042553	40.8989	5.35399	up
D171	23.33	3-(4-Isopropylphenyl)-2-methylpropionaldehyde	190.136	C13H18O	1466	Aldehyde	103-95-7	35303.6	34145.6	25538.6	39209.5	34620.1	55043.1	0.810907	0.202709	1.35673	0.440133	insig
XMW1364	23.54	7-Octylidenebicyclo[4.1.0]heptane	206.203	C15H26	1522	Terpenes	82253-11-0	26821.7	22996.8	30775.6	20445.6	15958.5	26232.5	0.803497	0.188759	0.777187	-0.363667	insig
XMW1161	23.55	4',6'-Dihydroxy-2',3'-dimethylacetophenone	180.079	C10H12O3	1697	Ketone	7743-14-8	9811.1	13376.3	13362.6	6416.56	4982.85	8480.99	1.10074	0.0245528	0.543924	-0.878524	insig
WMW0049	23.81	5,9-Undecadien-2-one, 6,10-dimethyl-, (Z)-	194.167	C13H22O	1435	Ketone	3879-26-3	35068.9	33528.9	20857.6	41507.7	27796.6	53350.6	0.66302	0.283057	1.37113	0.455365	insig
QMW0530	23.93	2-Bromo dodecane	248.114	C12H25Br	1505	Other	13187-99-0	9299.4	15218.7	12321.8	7931.25	7414.23	7500.56	1.07446	0.110841	0.620144	-0.689325	insig
XMW0238	24.08	Undecane, 4,4-dimethyl-	184.219	C13H28	1229	Alkanes	17312-68-4	12452.7	16919.2	14725.8	15352.8	10660.8	15243.6	0.304365	0.663392	0.935588	-0.0960544	insig
XMW0383	24.14	1,4,7,-Cycloundecatriene, 1,5,9,9-tetramethyl-, Z,Z,Z-	204.188	C15H24	1472	Alkanes	1000062-61-9	3057.03	3401.41	2100.06	217911	271698	208716	1.25393	0.00720114	81.5943	6.3504	up
XMW0159	24.19	2,6,10-Trimethyltridecane	226.266	C16H34	1419	Alkanes	3891-99-4	28613.6	38723.2	32409.1	51827.9	31215	65349.3	0.749488	0.239318	1.4877	0.573083	insig
XMW0203	24.19	2,5-di-tert-Butyl-1,4-benzoquinone	220.146	C14H20O2	1466	Aromatics	2460-77-7	8573.46	6992.37	6510.89	73846.4	61285.9	45908.8	1.25231	0.0219269	8.20054	3.03572	up
XMW0174	24.56	2,2'-Ethylidenebis(5-methylfuran)	190.099	C12H14O2	1379	Heterocyclic compound	3209-79-8	68987.7	78426.2	48922.2	39326.6	36534	63648.1	0.79301	0.19664	0.71056	-0.492971	insig
WMW0051	24.64	3-Buten-2-one, 4-(2,6,6-trimethyl-1-cyclohexen-1-yl)-	192.151	C13H20O	1491	Terpenes	14901-07-6	9.0476e+06	1.03075e+07	7.09704e+06	4.36519e+06	3.99077e+06	6.30911e+06	1.08896	0.0319077	0.5544	-0.851001	insig
KMW0639	24.71	3-Buten-2-one, 4-(2,2,6-trimethyl-7-oxabicyclo[4.1.0]hept-1-yl)-	208.146	C13H20O2	1610	Terpenes	23267-57-4	2.50157e+06	3.32165e+06	1.76079e+06	1.04647e+06	944703	1.71761e+06	1.02649	0.084045	0.489027	-1.03201	insig
XMW0134	24.87	Hexadecane, 2,6,11,15-tetramethyl-	282.329	C20H42	1753	Alkanes	504-44-9	72817.7	112723	116484	103156	69625.6	97508	0.342671	0.578555	0.894928	-0.160157	insig
XMW1481	25.1	5'-Hydroxy-2',3',4'-trimethylacetophenone	178.099	C11H14O2	1589	Ketone	13667-28-2	15036.2	17167.4	18694.7	11166.4	10083.2	16653.6	0.903639	0.154992	0.744684	-0.425299	insig
KMW0602	25.17	Pentadecane	212.25	C15H32	1500	Alkanes	629-62-9	685178	1.07848e+06	927125	954596	477503	753713	0.53055	0.403341	0.812332	-0.299858	insig
XMW0507	25.53	1,3-Benzenediol, 5-pentyl-	180.115	C11H16O2	1632	Phenol	500-66-3	153798	103027	47777.5	110014	90486.5	153372	0.396148	0.675085	1.16175	0.216303	insig
XMW0834	25.58	3,5-Dihydroxy-4'-methoxydiphenyl	216.079	C13H12O3	1780	Alcohol	54960-96-2	4610.06	5965.97	3649.54	2765.41	1733.55	4735.7	0.776411	0.212364	0.649158	-0.623358	insig
WMW0050	25.84	2(4H)-Benzofuranone, 5,6,7,7a-tetrahydro-4,4,7a-trimethyl-, (R)-	180.115	C11H16O2	1532	Ester	17092-92-1	673883	656680	403316	342697	274382	522403	0.815868	0.160705	0.657187	-0.605625	insig
XMW0810	26.28	(-)-delta.-Panasinsine	204.188	C15H24	1387	Terpenes	1000156-11-8	16742.2	20732.3	11267.4	7652.36	5348.44	13201.1	0.912596	0.106977	0.537563	-0.895493	insig
KMW0526	26.93	2-Buten-1-one, 1-(2,6,6-trimethyl-1,3-cyclohexadien-1-yl)-, (E)-	190.136	C13H18O	1386	Terpenes	23726-93-4	8934.03	11023.3	7126.86	5492.33	3963.1	6424.37	1.02376	0.0590069	0.586312	-0.770259	insig
XMW0390	27.23	2,2,4-Trimethyl-1,3-pentanediol diisobutyrate	286.214	C16H30O4	1605	Ester	6846-50-0	25244.1	36458.1	31606.8	17856.7	16468.3	17322.1	1.18329	0.0485968	0.553507	-0.853328	insig
KMW0642	27.55	Hexadecane	226.266	C16H34	1600	Alkanes	544-76-3	17900.8	26282.9	15427.5	23266.3	10951	15482.3	0.409029	0.53506	0.833728	-0.262351	insig
XMW0205	29.4	Benzimidazo[2,1-a]isoquinoline	218.084	C15H10N2	1835	Heterocyclic compound	239-44-1	11646.8	14837.9	5823.93	25941.4	13975.9	30717.1	0.936104	0.107014	2.18624	1.12845	insig
KMW0682	30.12	Pentadecanal	226.23	C15H30O	1711	Aldehyde	2765-11-9	4957.35	5228.73	3102.62	3135.6	1956.79	3036.94	0.901107	0.106361	0.611748	-0.708991	insig
XMW0958	31.96	1-Iodoundecane	282.084	C11H23I	1534	Alkanes	4282-44-4	2231.76	2729.95	1937.47	3268.15	1827.6	4288.61	0.536657	0.367368	1.36021	0.443831	insig
XMW0055	34.02	7,9-Di-tert-butyl-1-oxaspiro(4,5)deca-6,9-diene-2,8-dione	276.173	C17H24O3	2081	Heterocyclic compound	82304-66-3	37552.4	49565.3	74734.7	40778.9	51810.1	28088	0.598492	0.358532	0.745599	-0.423529	insig
