# Supplementary material for: Development of attractants and repellents for Tuta absoluta based on plant volatiles from tomato and eggplant
Source: Frontiers journal article supplement (doi:10.3389/fsufs.2023.1155317), 2023-04-27
Supplement: Table_2.xlsx [file Table_2.xlsx]

## Sheet: Sheet1
Table S2. Differentially accumulated volatile organic compounds detected in eggplant vs tomato in triplicate following discriminant analysis of orthogonal partial least squares with threshold of log2FC ≥ 1.2 and variable importance in projection (VIP) ≥ 1.
Compounds	Class	CAS	Eggplant	Tomato	VIP	p value	Fold Change	Log2FC	Type
			Mean ± (SD)	Mean ± (SD)
1-Nonanol	Alcohol	143-08-8	164253.819±27817.768	425794.966±56991.457	1.136	0.028	2.592	1.374	up
2-Phenylethano	Alcohol	60-12-8	222551.732±17740.927	858542.213±97999.752	1.224	0.02	3.858	1.948	up
2-Ethyl-1-hexanol	Alcohol	1000411-44-8	821474.026±76499.127	9057407.269±1694564.008	1.236	0.04	11.026	3.463	up
5-Ethylcyclopent-1-enecarboxaldehyde	Aldehyde	36431-60-4	44960.395±3274.569	415905.678±70142.779	1.234	0.034	9.25	3.21	up
1,4,7,-Cycloundecatriene, 1,5,9,9-tetramethyl-, Z,Z,Z-	Alkanes	1000062-61-9	2852.833±389.296	232775.019±19641.687	1.254	0.007	81.594	6.35	up
1,4-Diethylbenzene	Aromatics	105-05-5	16222.676±2638.543	51103.958±5620.767	1.198	0.013	3.15	1.655	up
2,5-Di-tert-butyl-1,4-benzoquinone	Aromatics	2460-77-7	7358.907±622.978	60347.029±8078.557	1.252	0.022	8.201	3.036	up
Ethyl heptanoate	Ester	106-30-9	44624.471±12789.279	871482.098±97957.878	1.218	0.013	19.529	4.288	up
Ethyl octanoate	Ester	106-32-1	77481.975±22424.461	1110770.113±227005.227	1.218	0.044	14.336	3.842	up
2-Isopropyl-3-methoxypyrazine	Heterocyclic compound	25773-40-4	NS	118136.279±19648.062	1.245	0.029	24.744	4.629	up
1H-Pyrazole-1-carboximidamide, 3,5-dimethyl-	Heterocyclic compound	22906-75-8	2767.315±276.32	184802.096±23905.294	1.249	0.017	66.78	6.061	up
2,2'-Isopropylidenebis(5-methylfuran)	Heterocyclic compound	59212-75-8	3092.216±567.403	10216.755±479.486	1.204	0.001	3.304	1.724	up
o-Nitrophenol	Phenol	88-75-5	13376.557±1471.609	114809.454±5682.066	1.245	0.002	8.583	3.101	up
Bicyclo[3.1.1]hept-2-ene, 3,6,6-trimethyl-	Terpenes	4889-83-2	7110.853±224.799	36698.733±3486.533	1.243	0.013	5.161	2.368	up
.beta.-Panasinsene	Terpenes	1000159-39-0	9449.269±1317.767	386464.819±24926.295	1.252	0.004	40.899	5.354	up
Benzyl alcohol	Alcohol	100-51-6	3199002.779±361707.189	1183398.605±119199.254	1.213	0.022	0.37	-1.435	down
3-Methylpenta-1,3-diene-5-ol, (E)-	Alcohol	1572-08-3	331253.666±38865.641	51114.831±7338.084	1.245	0.016	0.154	-2.696	down
2-Cyclohexen-1-ol, 1-methyl-4-(1-methylethyl)-, cis-	Alcohol	29803-82-5	118707.99±6976.845	56562.205±7075.01	1.192	0.003	0.476	-1.07	down
Furfural	Aldehyde	98-01-1	1288577.426±172044.689	117061.164±25086.903	1.242	0.019	0.091	-3.46	down
trans-2-Hexen-1-al	Aldehyde	6728-26-3	13783299.056±1850381.716	1629400.475±347965.454	1.234	0.019	0.118	-3.081	down
Benzaldehyde	Aldehyde	100-52-7	1659676.062±235739.691	231743.702±33020.578	1.242	0.024	0.14	-2.84	down
trans, trans-2,4-Heptandienal	Aldehyde	4313-03-5	2592094.211±428842.829	121609.039±34988.116	1.244	0.028	0.047	-4.414	down
trans-2-Nonenal	Aldehyde	18829-56-6	293151.115±52227.671	26238.999±3620.032	1.247	0.036	0.09	-3.482	down
trans,cis-2,6-Nonadienal	Aldehyde	557-48-2	1250896.042±283261.965	11365.113±2393.159	1.254	0.048	0.009	-6.782	down
trans,trans-2,4-Nonadienal	Aldehyde	5910-87-2	310386.628±63724.519	5928.383±1794.392	1.246	0.041	0.019	-5.71	down
2-Octenal	Aldehyde	2363-89-5	437758.848±17549.398	181106.841±26399.581	1.202	0.002	0.414	-1.273	down
2,4-Dimethylbenzaldehyde	Aldehyde	15764-16-6	25559.353±1324.454	4857.18±854.428	1.234	0	0.19	-2.396	down
2-Pentylfuran	Heterocyclic compound	3777-69-3	530822.717±60096.816	50444.659±1385.791	1.255	0.015	0.095	-3.395	down
2-Ethyl-5-methylpyrazine	Heterocyclic compound	13360-64-0	25144.106±1915.929	11234.342±949.859	1.227	0.008	0.447	-1.162	down
2-Acetyl-3,4,5,6-tetrahydropyridine	Heterocyclic compound	27300-27-2	36748.15±5424.296	2813.439±346.116	1.242	0.024	0.077	-3.707	down
2-((3,3-Dimethyloxiran-2-yl)methyl)-3-methylfuran	Heterocyclic compound	92356-06-4	66491.978±2910.684	25928.222±1719.989	1.244	0.001	0.39	-1.359	down
Furan, 2,3-dihydro-4-methyl-	Heterocyclic compound	34314-83-5	165754.155±13975.894	37976.817±8146.429	1.217	0.003	0.229	-2.126	down
Isophorone	Ketone	78-59-1	436696.032±16785.591	181400.748±26543.991	1.202	0.002	0.415	-1.267	down
4-Hexen-3-one	Ketone	2497-21-4	774137.631±117476.196	125039.187±23195.341	1.232	0.027	0.162	-2.63	down
2,2,6-Trimethylcyclohexanone	Ketone	2408-37-9	92408.365±6424.144	46129.118±4136.728	1.201	0.006	0.499	-1.002	down
2-sec-Butylphenol	Phenol	89-72-5	231692.502±33321.908	5488.176±1912.62	1.244	0.021	0.024	-5.4	down
5-Hydroxyindan	Phenol	1470-94-6	45488.072±7235.408	8695.379±336.823	1.237	0.036	0.191	-2.387	down
γ-Terpinene	Terpenes	99-85-4	36261.941±2319.088	10614.189±1406.7	1.231	0.002	0.293	-1.772	down
Ionone	Terpenes	8013-90-9	35639.721±3814.66	13358.013±2166.967	1.186	0.013	0.375	-1.416	down
